# Supplementary material
Source: PubMed Central journal article supplement (PMC6658111)
Supplement: NIHMS1510995-supplement-1.pdf [file NIHMS1510995-supplement-1.pdf]

## Supplemental Information

**Table S1: Diffraction data and crystallographic refinement statistical values**

| Structure                                   | CaMKII kinase domain<br>/dEAG <sub>long</sub> /<br>Mg <sup>2+</sup> -ADP | CaMKII kinase domain<br>/dEAG <sub>long</sub> /<br>Mg <sup>2+</sup> -AMPPN | CaMKII <sup>D136N</sup> kinase<br>domain /dEAG <sub>long</sub> <sup>P</sup> /<br>Mg <sup>2+</sup> -ADP |
|---------------------------------------------|--------------------------------------------------------------------------|----------------------------------------------------------------------------|--------------------------------------------------------------------------------------------------------|
| PDB entry                                   | 5FG8                                                                     | 5H9B                                                                       | 5HU3                                                                                                   |
| <b>Diffraction data</b>                     |                                                                          |                                                                            |                                                                                                        |
| Space group                                 | P12 <sub>1</sub> 1                                                       | P12 <sub>1</sub> 1                                                         | P12 <sub>1</sub> 1                                                                                     |
| Unit cell parameters<br>a, b, c (Å), α=γ, β | 36.50, 59.22, 70.76,<br>90.00, 97.23                                     | 35.82, 59.13, 70.34,<br>90.00, 99.02                                       | 36.91, 59.22, 70.30, 90.00,<br>96.68                                                                   |
| Wavelength (Å)                              | 0.98403                                                                  | 0.98406                                                                    | 0.97625                                                                                                |
| Resolution range (Å)                        | 30.19-1.88 (1.95-1.88)                                                   | 45.03-2.25 (2.33-2.25)                                                     | 30.08-1.82 (1.88-1.82)                                                                                 |
| No. of unique<br>reflections                | 23,764 (2,099)                                                           | 13,806 (1,342)                                                             | 26,540 (2,412)                                                                                         |
| No. of measured<br>reflections              | 77,000 (5,111)                                                           | 47,277 (4,686)                                                             | 87,981 (5,854)                                                                                         |
| Multiplicity                                | 3.2 (2.4)                                                                | 3.4 (3.5)                                                                  | 3.3 (2.4)                                                                                              |
| Completeness (%)                            | 97.2 (88.0)                                                              | 99.4 (99.5)                                                                | 97.9 (91.0)                                                                                            |
| I/σI                                        | 12.4 (1.5)                                                               | 10.4 (1.7)                                                                 | 19.3 (1.5)                                                                                             |
| R <sub>meas</sub> (%)                       | 6.0 (86.2)                                                               | 8.0 (93.9)                                                                 | 4.1 (73.6)                                                                                             |
| <b>Refinement data</b>                      |                                                                          |                                                                            |                                                                                                        |
| Resolution range (Å)                        | 30.19-1.96 (2.04-1.96)                                                   | 45.03-2.25 (2.42-2.25)                                                     | 30.08-1.89 (1.96-1.89)                                                                                 |
| No. of reflections                          | 21,328                                                                   | 13,780                                                                     | 24,034                                                                                                 |
| R <sub>work</sub> /R <sub>free</sub> (%)    | 19.1/22.1 (29.9/30.3)                                                    | 20.3/22.2 (32.2/37.8)                                                      | 19.2/22.8 (39.7/42.0)                                                                                  |
| No. of atoms in model:                      |                                                                          |                                                                            |                                                                                                        |
| Protein                                     | 2,304                                                                    | 2,288                                                                      | 2,271                                                                                                  |
| Solvent                                     | 69                                                                       | 22                                                                         | 79                                                                                                     |
| Nucleotide                                  | 27                                                                       | 27                                                                         | 27                                                                                                     |
| Mg <sup>2+</sup>                            | 1                                                                        | 1                                                                          | 1                                                                                                      |
| Average B value (Å <sup>2</sup> ):          |                                                                          |                                                                            |                                                                                                        |
| Protein                                     | 58                                                                       | 76                                                                         | 49                                                                                                     |
| Solvent                                     | 44                                                                       | 49                                                                         | 41                                                                                                     |
| Nucleotide                                  | 43                                                                       | 69                                                                         | 39                                                                                                     |
| Mg <sup>2+</sup>                            | 46                                                                       | 72                                                                         | 39                                                                                                     |
| RMSD bond length (Å)                        | 0.010                                                                    | 0.004                                                                      | 0.017                                                                                                  |
| RMSD bond angle (°)                         | 1.171                                                                    | 0.758                                                                      | 1.347                                                                                                  |

RMSD: root-mean-square deviation. High-resolution bin statistics are shown in parentheses.

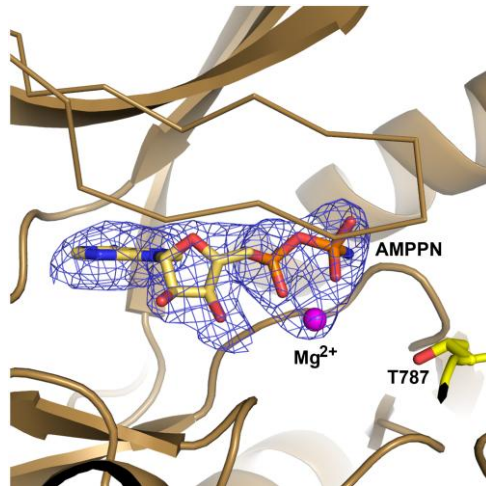

**Figure S1: CaMKII kinase domain bound with AMPPN**

View of active site of native CaMKII kinase domain (residues 1-283) crystallized in the presence of *d*EAG<sub>long</sub> and AMPPNP. Mesh shows omit density map revealing the presence of AMPPN. Kinase shown as dark-wheat cartoon and T787 in channel fragment as yellow stick. AMPPN and Mg<sup>2+</sup> are indicated.

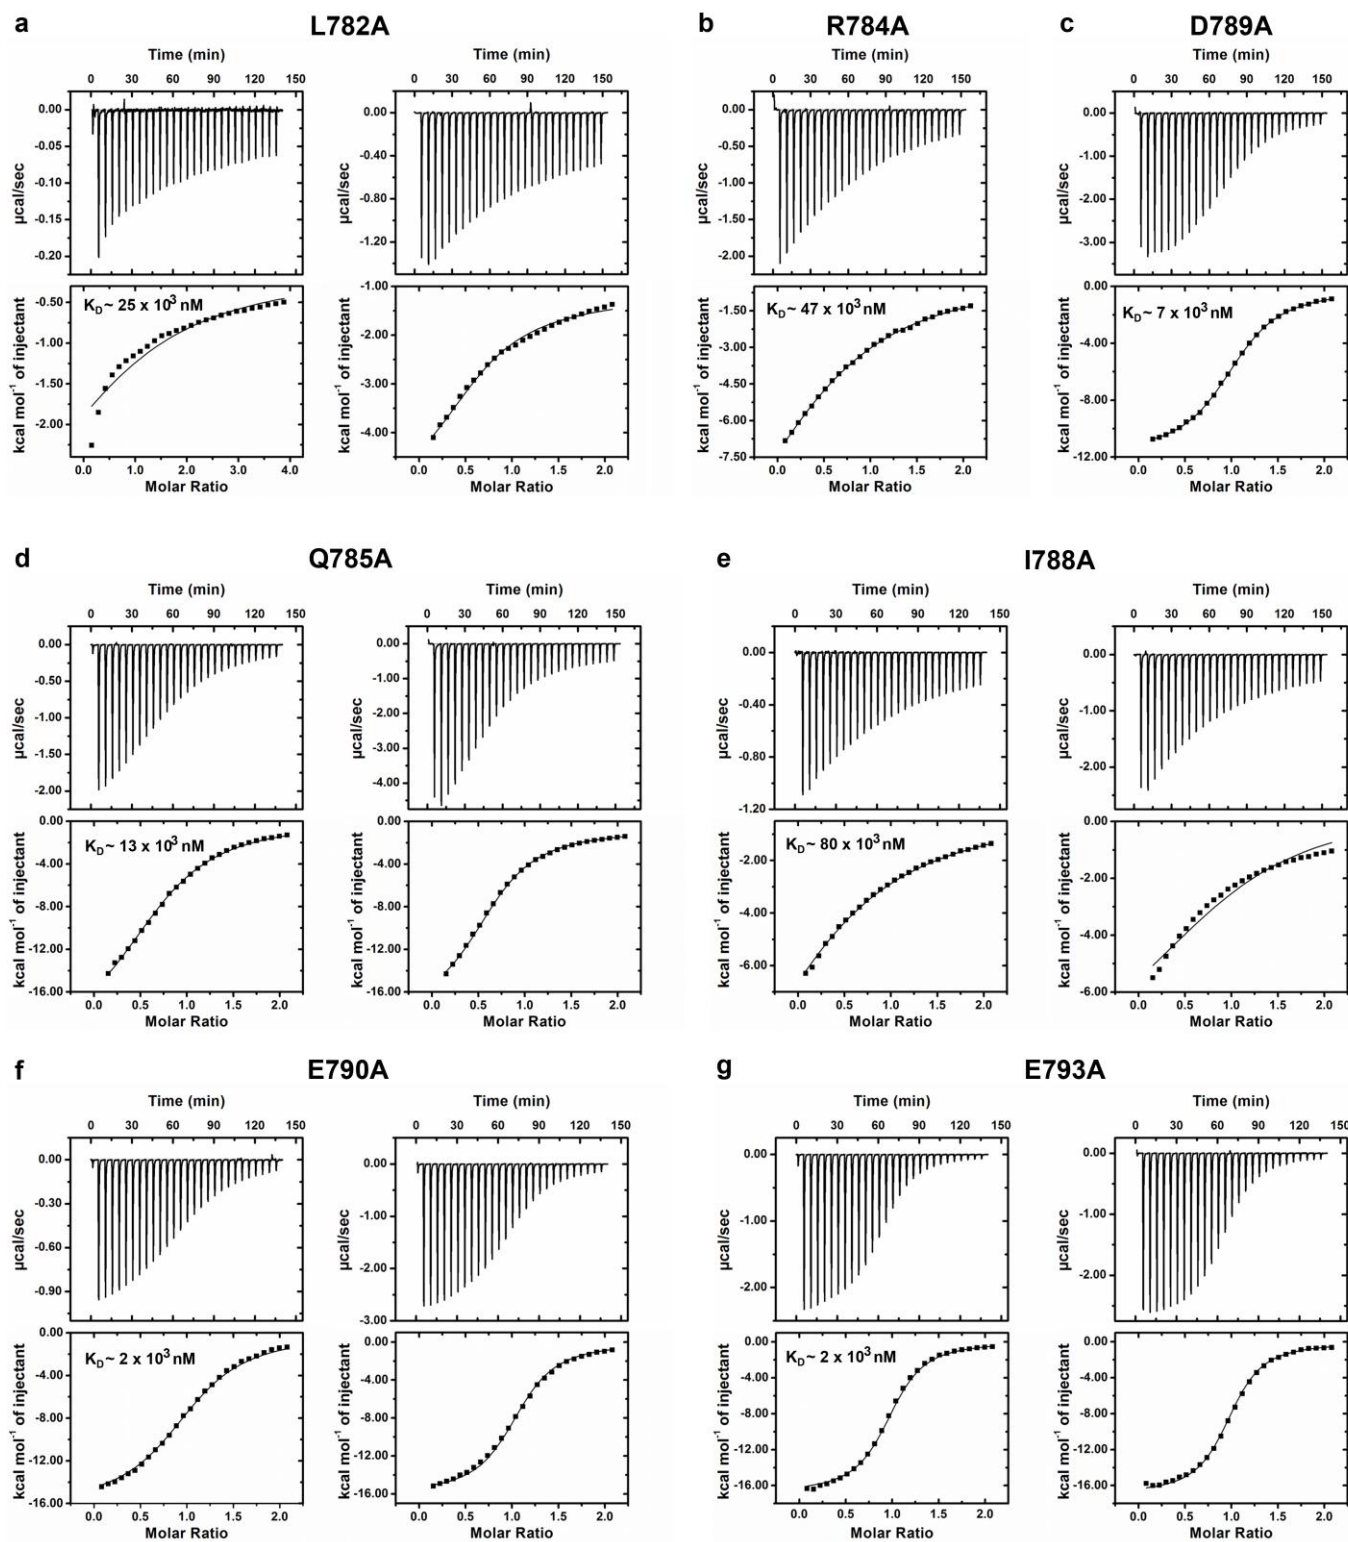

**Figure S2: *dEAG* channel fragment alanine scanning experiments.**

ITC experiments of wild type CaMKII kinase domain and mutants of *dEAG*<sub>long</sub> channel fragment in the presence of Mg<sup>2+</sup>-AMPPNP. Mutants as indicated. Titration injection heats are shown in the upper panel and binding isotherm of integrated binding enthalpies in the lower panel.  $K_D$  values are shown for each mutant in lower panels. The large decrease in affinity and/or decrease in protein expression levels for some mutants led us to perform just 2 independent calorimetric assays for L782A, Q785A, I788A, E790A and E793A. In these cases we executed assays at two different

concentrations and performed a global fit of the data using the Affinimeter package. Data and fit for both these experiments is shown. For R784A and D789A one of the three replicas performed is shown.

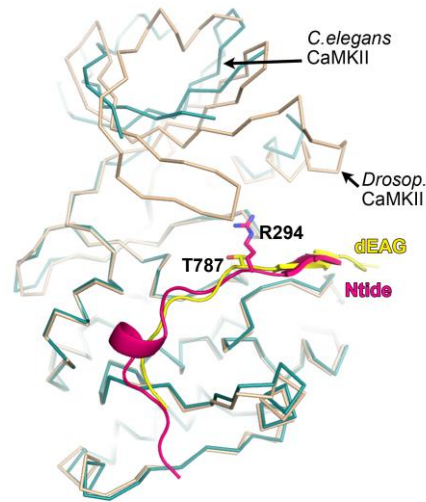

**Figure S3: Structural similarity between kinase domain bound to *dEAG* and bound to the CaMKII inhibitor Ntide.**

CaMKII kinase domain/*dEAG*<sub>long</sub> complex (in wheat color) with bound Mg<sup>2+</sup>-ADP superposed on CaMKII kinase domain/Ntide complex (shown in cyan; PDB entry: 3KL8) from *C. elegans*. Channel fragment (*dEAG*) in yellow and Ntide (Ntide) in magenta. Residues T787 in *dEAG* and R294 in Ntide shown in stick. Superposition matched position of C $\alpha$ -atoms in the C-lobe of the two kinase domains (residues 97-275).

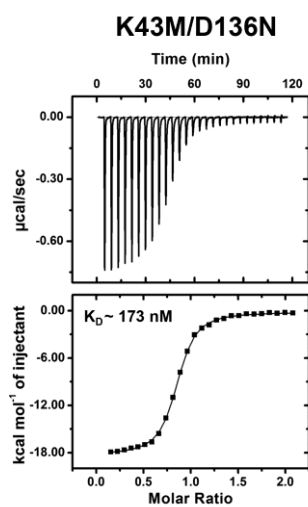

**Figure S4: Determination of affinity of channel fragment for CaMKII kinase domain mutant.**

ITC experiment of kinase domain K43M/D136N double mutant titrated with  $dEAG_{\text{short}}$  channel fragment in the presence of  $Mg^{2+}$ -AMPPNP. Titration injection heats are shown in the upper panel and binding isotherm of integrated binding enthalpies in the lower panel.  $K_D$  value is shown in lower panel.

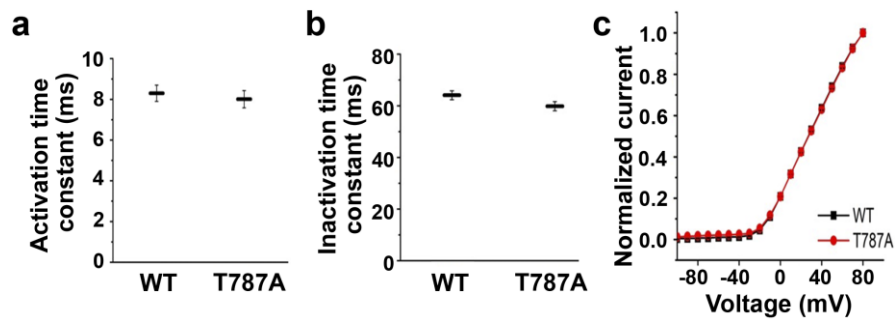

**Figure S5: Current characteristics for WT and T787A *dEAG* channels**

Comparison of **a)** activation time constant and **b)** inactivation time constant of WT and T787A *dEAG* channel current evoked at 60 mV. **c)** Comparison of the WT and T787A *dEAG* channel current-voltage relationship. Data are mean  $\pm$  SEM and  $n=7-8$ .

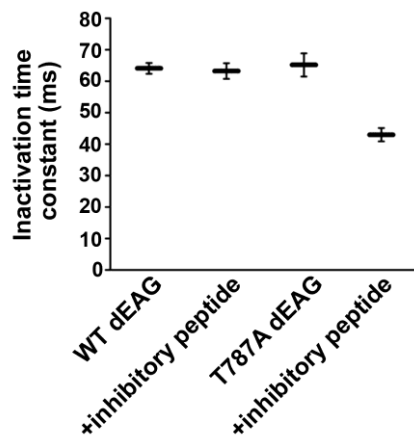

**Figure S6: Inactivation time constant for *dEAG* channel**

Inactivation time constant of current at 60 mV mediated by WT *dEAG* channel alone and exposed to the inhibitory peptide, T787A *dEAG* channel alone and exposed to the inhibitory peptide. Data are mean  $\pm$  SEM and  $n=7-10$ .

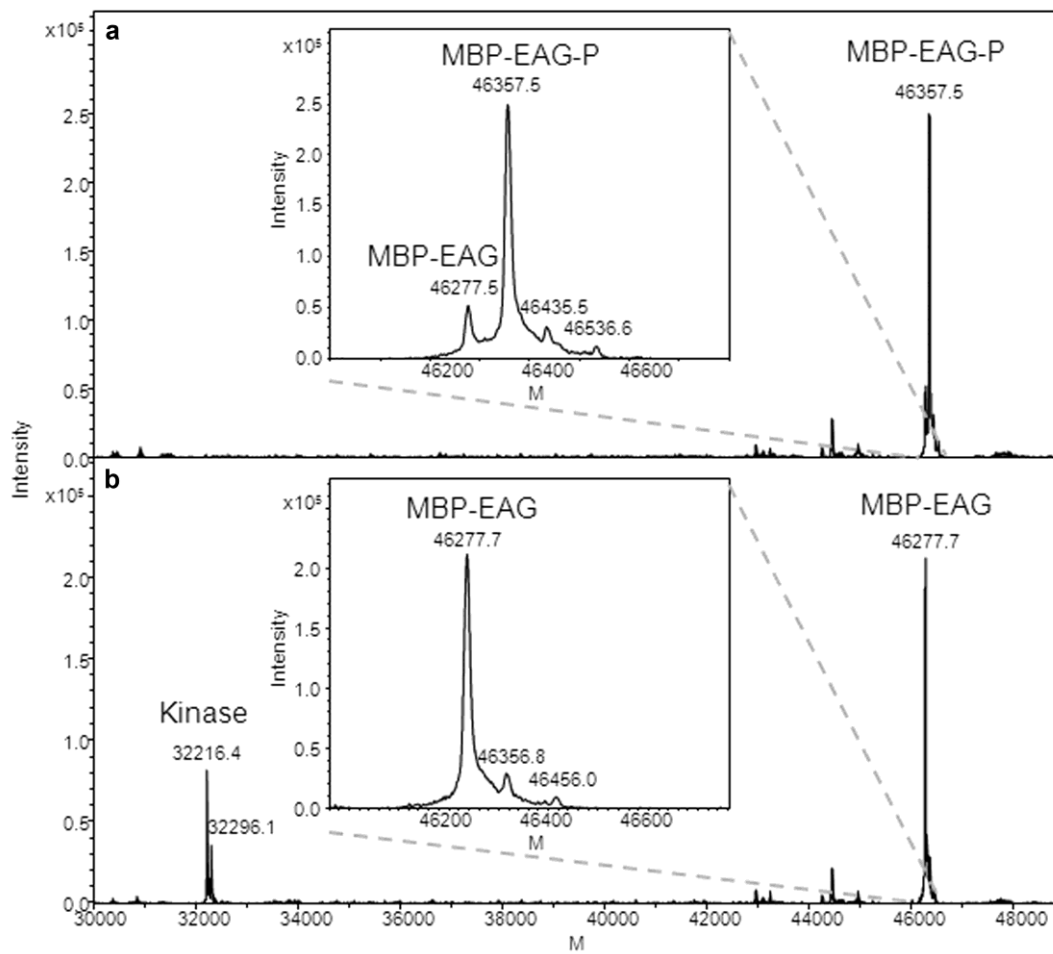

**Figure S7: Mass spectrometry spectra of samples before and after ITC experiments showing dephosphorylation.**

Deconvoluted UHR-QTOF mass spectra of phosphorylated MBP-*dEAG*<sub>short</sub> before **a)** and after **b)** ITC experiment in the presence of wild type CaMKII kinase domain and Mg<sup>2+</sup>-AMPCP.

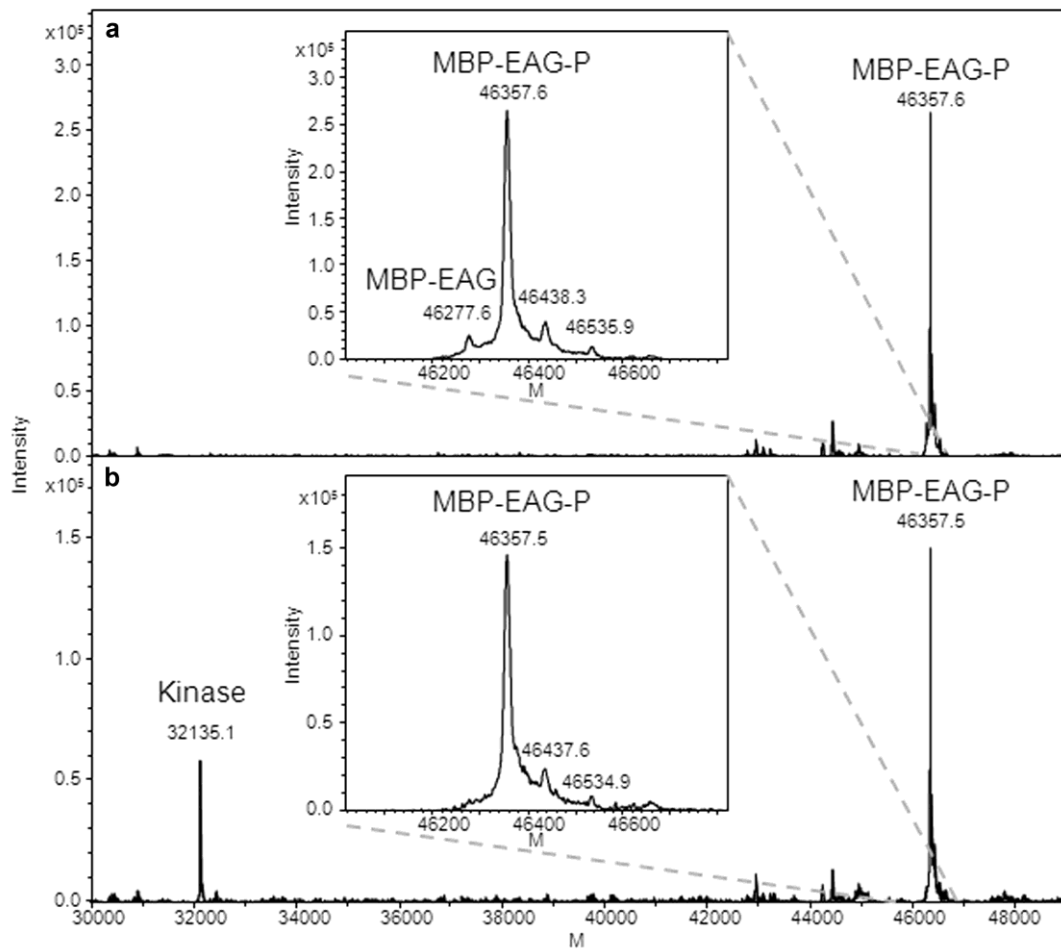

**Figure S8: Mass spectrometry spectra of samples before and after ITC experiments showing no change in phosphorylation.**

Deconvoluted UHR-QTOF mass spectra of phosphorylated MBP-*d*EAG before **a**) and after **b**) ITC experiment in the presence of D136N CaMKII kinase domain and  $Mg^{2+}$ -ADP.
